# Supplementary material
Source: PubMed Central journal article supplement (PMC11561816)
Supplement: NIHMS2034518-supplement-Supp1.pdf [file NIHMS2034518-supplement-Supp1.pdf]

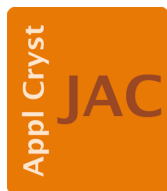

JOURNAL OF  
APPLIED  
CRYSTALLOGRAPHY

**Volume 57 (2024)**

**Supporting information for article:**

**Simulation of neutron dark-field data for grating-based interferometers**

**Caitlyn M. Wolf, Youngju Kim, Paul Kienzle, Pushkar S. Sathe, M. Cyrus Daugherty, Peter Bajcsy, Daniel S. Hussey and Katie M. Weigandt**

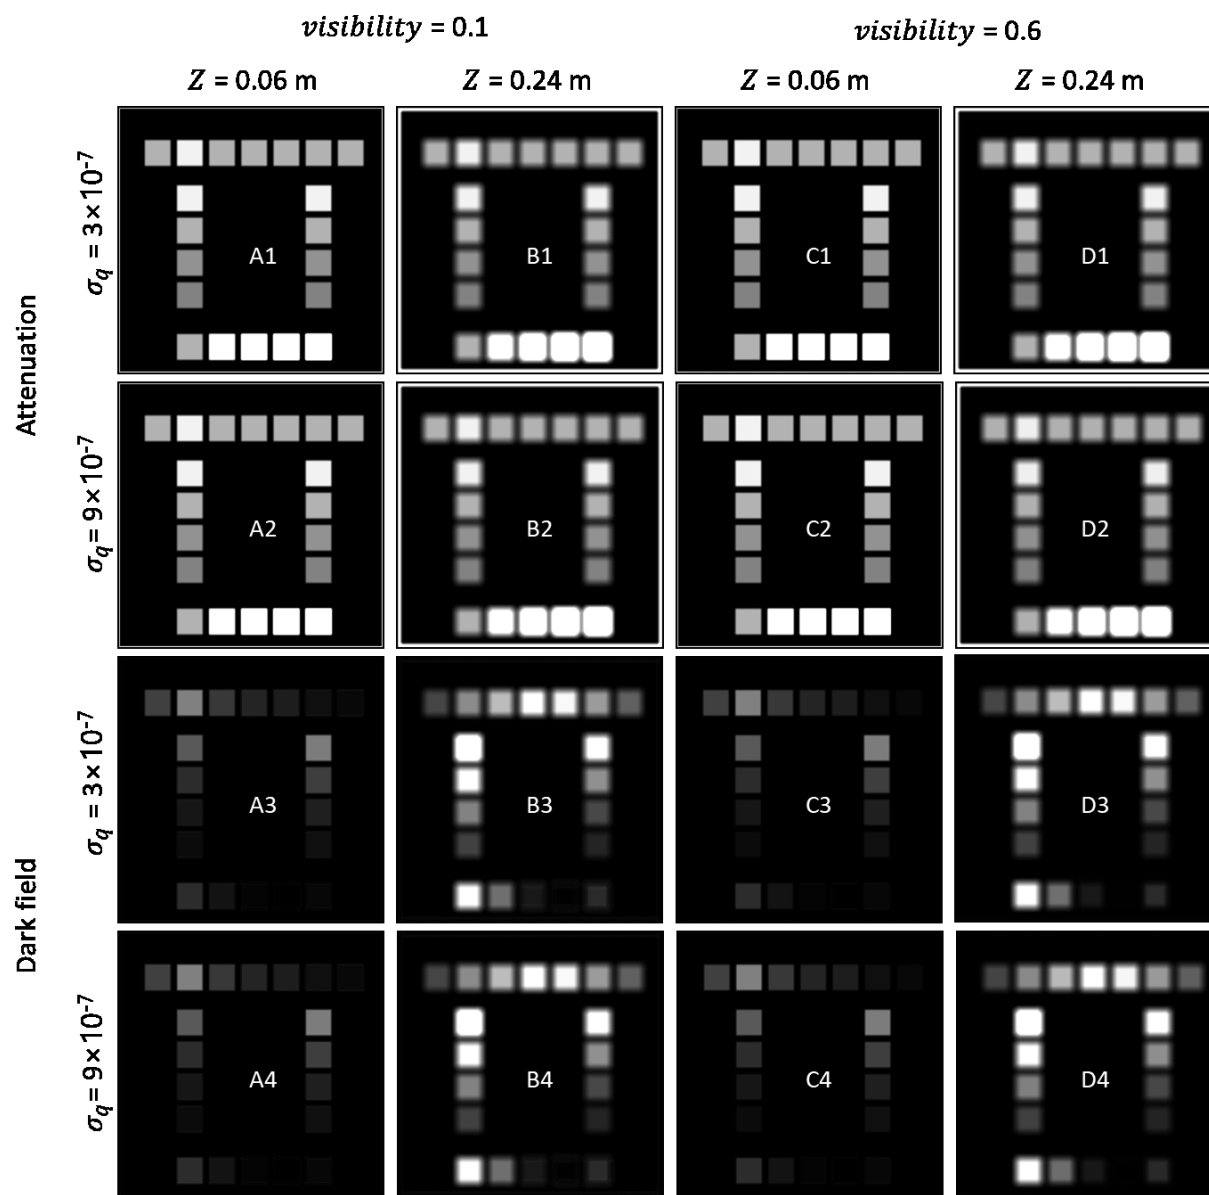

**Figure S1.** Example of attenuation contrast and dark field contrast image results of simulation with various experiment scenes. Other parameters are the period of Moiré pattern of 1 mm; the mean intensity of moiré pattern of  $1e4$ ; the wavelength of  $3 \text{ \AA}$ ; the distance from aperture to detector of 6 m; the aperture size of 10 cm; 6 phase steps. Distances from sample to detector of 60 mm and 240 mm correspond to autocorrelation length of 18 nm and 72 nm, respectively.

### Model Parameters for Simulated Small-Angle Neutron Scattering and Neutron Dark Field Spectra

The following section includes all relevant model details for simulations of small-angle neutron scattering and neutron dark field data. The *correlogram-tools* package makes use of the existing library of small-angle scattering models available in SasView (Doucet et al., 2022), and so all definitions of specified form factors, structure factors, and model parameters are provided in the SasView documentation (*SasView Documentation*, n.d.). The only exceptions are the neutron wavelength and sample pathlength model parameters which are used by *correlogram-tools* to simulate the neutron dark field imaging data and are defined in Equation 4 of the main manuscript.

**Table S1.** Model parameters for simulated data in Figure 4 of the main manuscript.

| Model Parameters                           | Value           |
|--------------------------------------------|-----------------|
| Form Factor                                | sphere          |
| Structure Factor                           | hardsphere      |
| Scale                                      | 1               |
| SLD ( $10^{-6} \text{ \AA}^{-2}$ )         | 1.41            |
| Solvent SLD ( $10^{-6} \text{ \AA}^{-2}$ ) | 6.34            |
| Radius ( $\text{\AA}$ )                    | 2500            |
| Radius Polydispersity                      | 0.1             |
| Effective Radius ( $\text{\AA}$ )          | 2500            |
| Volume Fraction                            | 0.1             |
| Neutron Wavelength ( $\text{\AA}$ )        | (2, 3, 4, 5, 6) |
| Sample Pathlength (mm)                     | 1               |

**Table S2.** Model parameters for simulated data in Figure 5(a-d) of the main manuscript.

| Model Parameters                           | Subplots               |                                   |
|--------------------------------------------|------------------------|-----------------------------------|
|                                            | (a, b)                 | (c, d)                            |
| Form Factor                                | sphere                 | sphere                            |
| Structure Factor                           | hardsphere             | hardsphere                        |
| Scale                                      | 1                      | 1                                 |
| SLD ( $10^{-6} \text{ \AA}^{-2}$ )         | 1.41                   | 1.41                              |
| Solvent SLD ( $10^{-6} \text{ \AA}^{-2}$ ) | 6.34                   | 6.34                              |
| Radius ( $\text{\AA}$ )                    | 1000                   | (125, 250, 500, 1000, 2500, 5000) |
| Radius Polydispersity                      | 0.1                    | 0.1                               |
| Effective Radius ( $\text{\AA}$ )          | 1000                   | (125, 250, 500, 1000, 2500, 5000) |
| Volume Fraction                            | (0.01, 0.05, 0.1, 0.2) | 0.1                               |
| Neutron Wavelength ( $\text{\AA}$ )        | 3                      | 3                                 |
| Sample Pathlength (mm)                     | 1                      | 1                                 |

**Table S3.** Model parameters for simulated data in Figure 5(e, f) of the main manuscript.

| Model Parameters                           | Form Factor |                      |           |          |
|--------------------------------------------|-------------|----------------------|-----------|----------|
|                                            | Sphere      | Rectangular<br>Prism | Ellipsoid | Cylinder |
| Scale                                      | 0.1         | 0.1                  | 0.1       | 0.1      |
| SLD ( $10^{-6} \text{ \AA}^{-2}$ )         | 1.41        | 1.41                 | 1.41      | 1.41     |
| Solvent SLD ( $10^{-6} \text{ \AA}^{-2}$ ) | 6.34        | 6.34                 | 6.34      | 6.34     |
| Radius ( $\text{\AA}$ )                    | 1000        |                      |           | 1000     |
| Radius Polydispersity                      | 0.1         |                      |           | 0.1      |
| Length ( $\text{\AA}$ )                    |             | 1000                 |           | 10000    |
| Length Polydispersity                      |             | 0.1                  |           | 0.1      |
| Length B:A                                 |             | 1                    |           |          |
| Length C:A                                 |             | 1                    |           |          |
| Equatorial Radius ( $\text{\AA}$ )         |             |                      | 1000      |          |
| Equatorial Radius Polydispersity           |             |                      | 0.1       |          |
| Polar Radius ( $\text{\AA}$ )              |             |                      | 5000      |          |
| Polar Radius Polydispersity                |             |                      | 0.1       |          |
| Neutron Wavelength ( $\text{\AA}$ )        | 3           | 3                    | 3         | 3        |
| Sample Pathlength (mm)                     | 2           | 2                    | 2         | 2        |

**Table S4.** Model parameters for simulated data in Figure 6(a-c) of the main manuscript.

| Model Parameters                           | Subplots          |                   |                   |
|--------------------------------------------|-------------------|-------------------|-------------------|
|                                            | (a)               | (b)               | (c)               |
| Form Factor                                | sphere            | sphere            | sphere            |
| Structure Factor                           | hardsphere        | hardsphere        | hardsphere        |
| Scale                                      | 1                 | 1                 | 1                 |
| SLD ( $10^{-6} \text{ \AA}^{-2}$ )         | 3.87              | 3.87              | 1.4               |
| Solvent SLD ( $10^{-6} \text{ \AA}^{-2}$ ) | 6.34              | -0.56             | 6.34              |
| Radius ( $\text{\AA}$ )                    | 250               | 250               | 250               |
| Radius Polydispersity                      | 0.1               | 0.1               | 0.1               |
| Effective Radius ( $\text{\AA}$ )          | 250               | 250               | 250               |
| Volume Fraction                            | 0.1               | 0.1               | 0.1               |
| Neutron Wavelength ( $\text{\AA}$ )        | 3                 | 3                 | 3                 |
| Sample Pathlength (mm)                     | (1, 2, 5, 10, 20) | (1, 2, 5, 10, 20) | (1, 2, 5, 10, 20) |

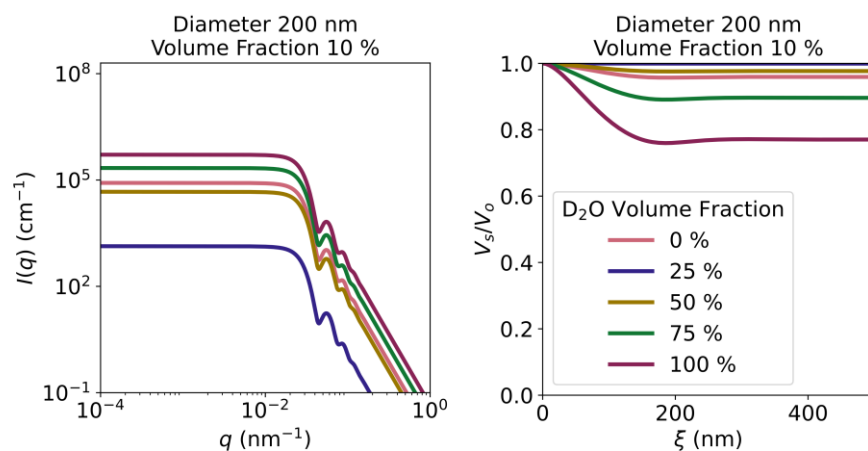

**Figure S2.** Simulated small-angle neutron scattering and loss in visibility data for 200 nm polystyrene nanoparticle dispersions in water at a volume fraction of 10 %. Contrast level was modulated by varying the light to heavy water ratio. The amount of heavy water in the solvent phase is shown in the legend of the right plot which is valid for both plots shown. All other relevant model parameters are shown in Table S5.

**Table S5.** Model parameters for simulations in Figure S2 of the supplementary information.

| Model Parameters                           | Subplots                        |
|--------------------------------------------|---------------------------------|
|                                            | (e,f)                           |
| Form Factor                                | sphere                          |
| Structure Factor                           | hardsphere                      |
| Scale                                      | 1                               |
| SLD ( $10^{-6} \text{ \AA}^{-2}$ )         | 1.41                            |
| Solvent SLD ( $10^{-6} \text{ \AA}^{-2}$ ) | (-0.56, 1.16, 2.89, 4.61, 6.34) |
| Radius ( $\text{\AA}$ )                    | 1000                            |
| Radius Polydispersity                      | 0.1                             |
| Effective Radius ( $\text{\AA}$ )          | 1000                            |
| Volume Fraction                            | 0.1                             |
| Neutron Wavelength ( $\text{\AA}$ )        | 3                               |
| Sample Pathlength (mm)                     | 1                               |

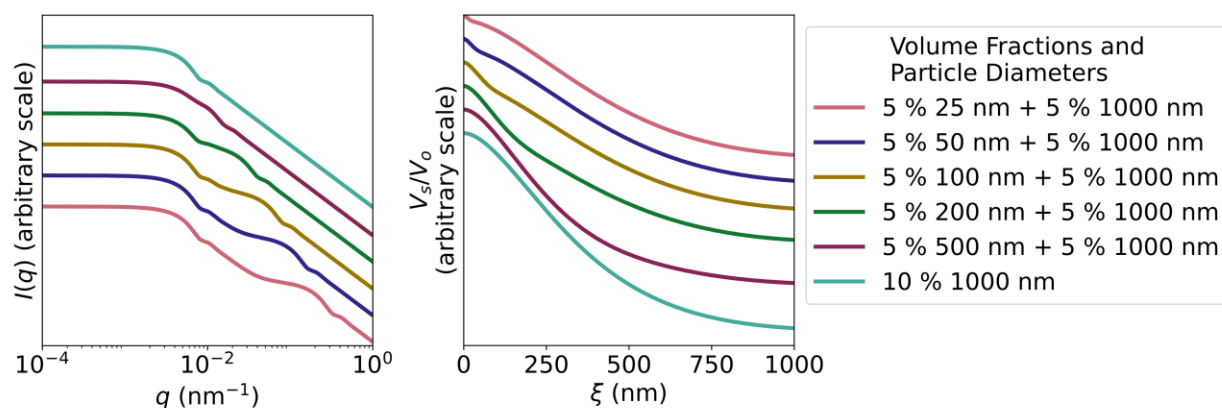

**Figure S3.** Simulated small-angle neutron scattering and loss in visibility data for bimodal polystyrene nanoparticle dispersions in water. Total volume fraction of particles was 10 %. A unimodal distribution at 1000 nm is provided for comparison. All other relevant model parameters are shown in Table S6.

**Table S6.** Model parameters for simulated data in Figure S3 of the supplementary information.

| Model Parameters                             | Sphere A + Sphere B               |
|----------------------------------------------|-----------------------------------|
| Form Factor                                  | sphere+sphere                     |
| Scale                                        | 0.05                              |
| A Scale                                      | 1                                 |
| A SLD ( $10^{-6} \text{ \AA}^{-2}$ )         | 1.41                              |
| A Solvent SLD ( $10^{-6} \text{ \AA}^{-2}$ ) | 6.34                              |
| A Radius ( $\text{\AA}$ )                    | (125, 250, 500, 1000, 2500, 5000) |
| A Radius Polydispersity                      | 0.2                               |
| B Scale                                      | 1                                 |
| B SLD ( $10^{-6} \text{ \AA}^{-2}$ )         | 1.41                              |
| B Solvent SLD ( $10^{-6} \text{ \AA}^{-2}$ ) | 6.34                              |
| B Radius ( $\text{\AA}$ )                    | 5000                              |
| B Radius Polydispersity                      | 0.2                               |
| Neutron Wavelength ( $\text{\AA}$ )          | 3                                 |
| Sample Pathlength (mm)                       | 1                                 |



## References

- Doucet, M., Cho, J. H., Alina, G., Attala, Z., Bakker, J., Bouwman, W., Bourne, R., Butler, P., Cadwallader-Jones, I., Campbell, K., Cooper-Benun, T., Durniak, C., Forster, L., Gilbert, P., Gonzalez, M., Heenan, R., Jackson, A., King, S., Kienzle, P., ... Wolf, C. (2022). *SasView version 5.0.5*. <https://doi.org/10.5281/ZENODO.6331344>
- SasView Documentation*. (n.d.). Retrieved October 5, 2023, from <https://www.sasview.org/docs/>
